# Supplementary material for: Living in urban areas with highly interconnected streets is linked to greater posterior hippocampal volume in older adults
Source: Research Square preprint supplement (doi:10.21203/rs.3.rs-7538181/v1), 2025-09-11
Supplement: Supplementary file 1 [file 846a869ef0e4748f293ed152.docx]

**Figure S1.** Geographical distribution of study participants (at the level of Statistical Areas 1 to preserve confidentiality)


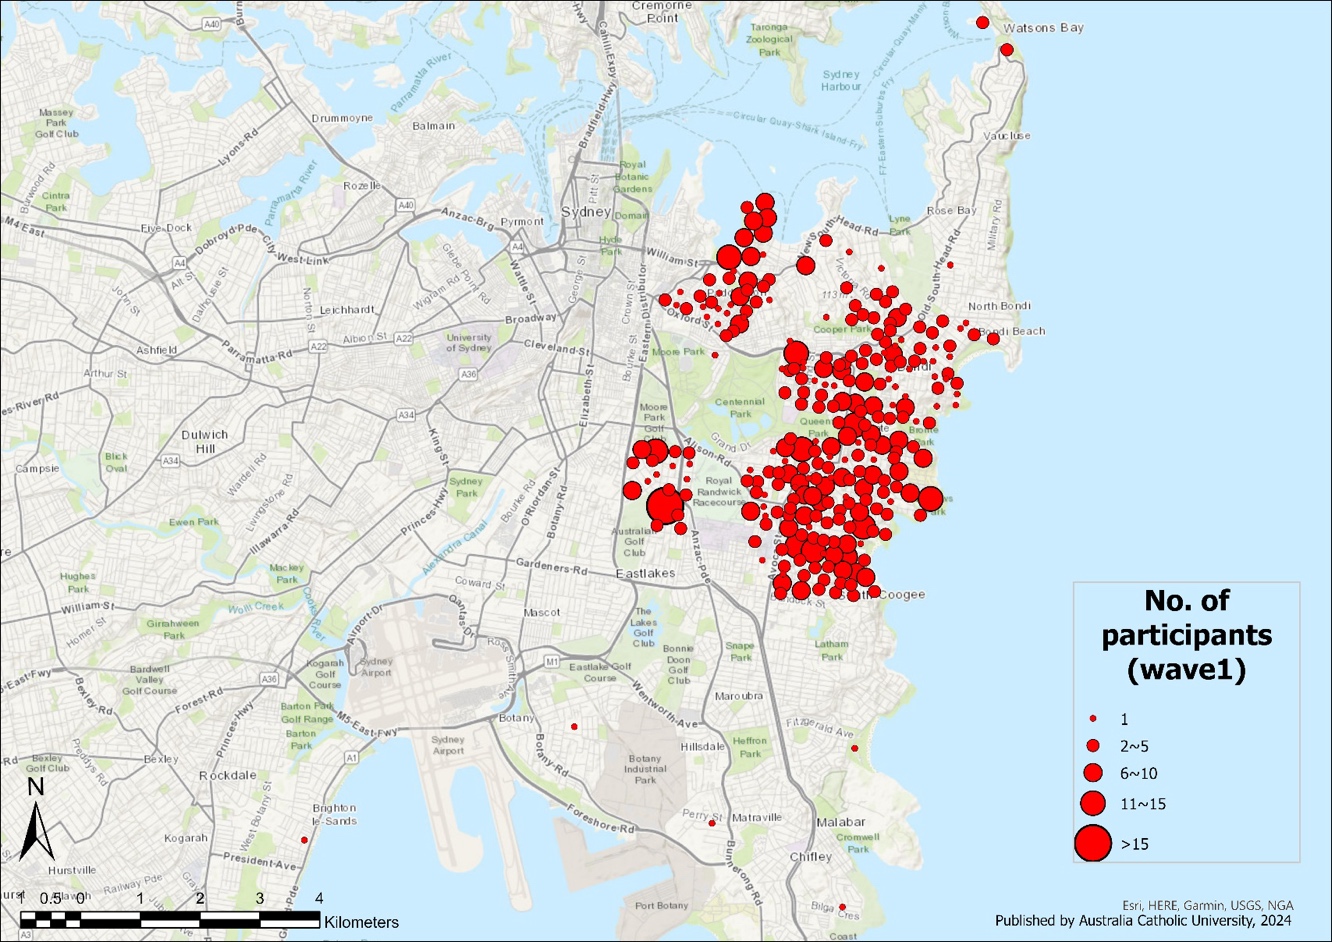


**Figure S2.** Flowchart of participants with hippocampal subfield data in the wave 1, 2 and 4 of the Sydney Memory and Ageing Study, assessed biennially.

Sydney MAS Study

Total Participants

N = 1037

Deceased: 34

Subfield data not available: 271

Deceased: 16

Subfield data not available: 181

Wave 4

Structural MRI

N=239

Wave 2

Structural MRI

N=347

Wave 1 (Baseline)

Structural MRI

N=514

Hippocampal subfield data not available: 523

**Figure S3.** High-level data processing steps used for analysis of association between hippocampal subfield volumes and street intersection density.

*
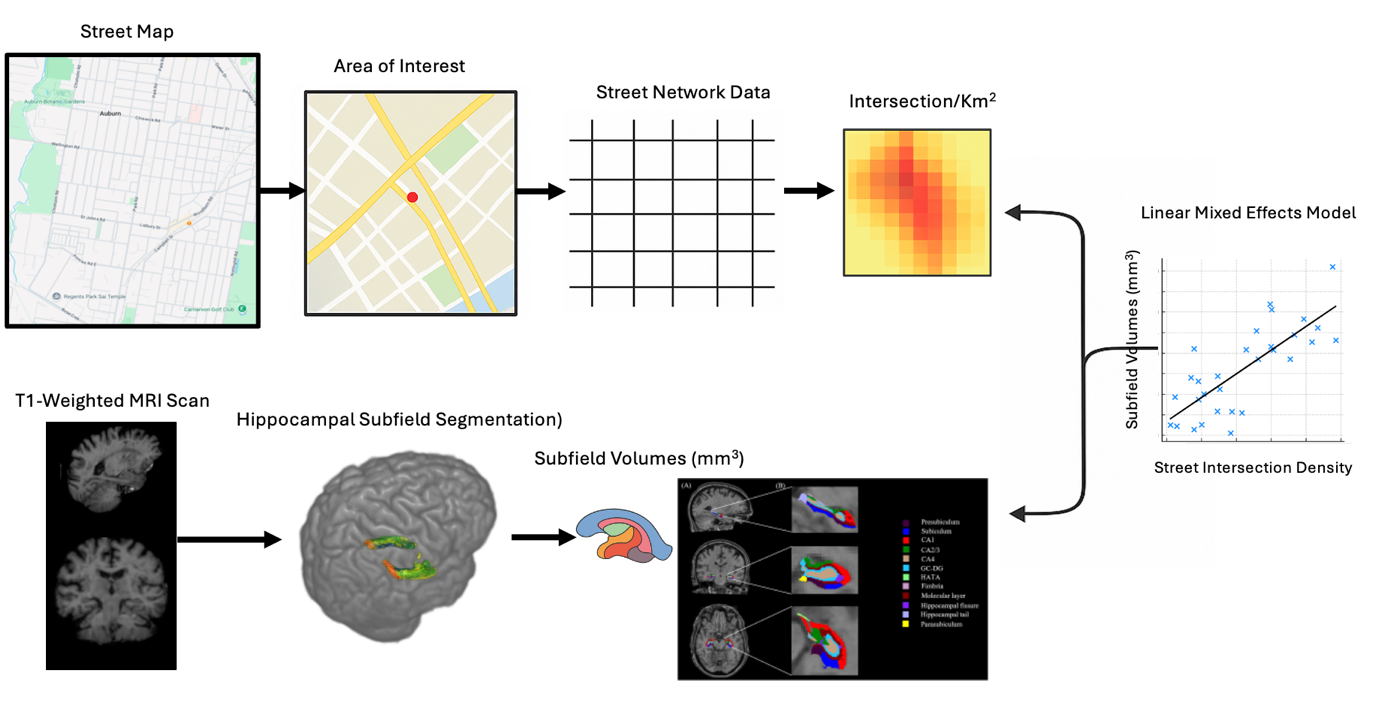
*

**Figure S4.** Directed acyclic graphs (DAGs) identified sets of variables to include in the statistical analyses to sufficiently control for potential confounders. The DAG below informed the model of the total effect of street intersection density in the residential buffer on hippocampal subfield volume. Variables with red circles denote the set of potential confounders. SES = socio-economic status; PM2.5, particulate matter with a diameter of 2.5 μm or smaller; NO2, nitrogen dioxide.


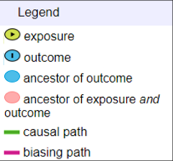

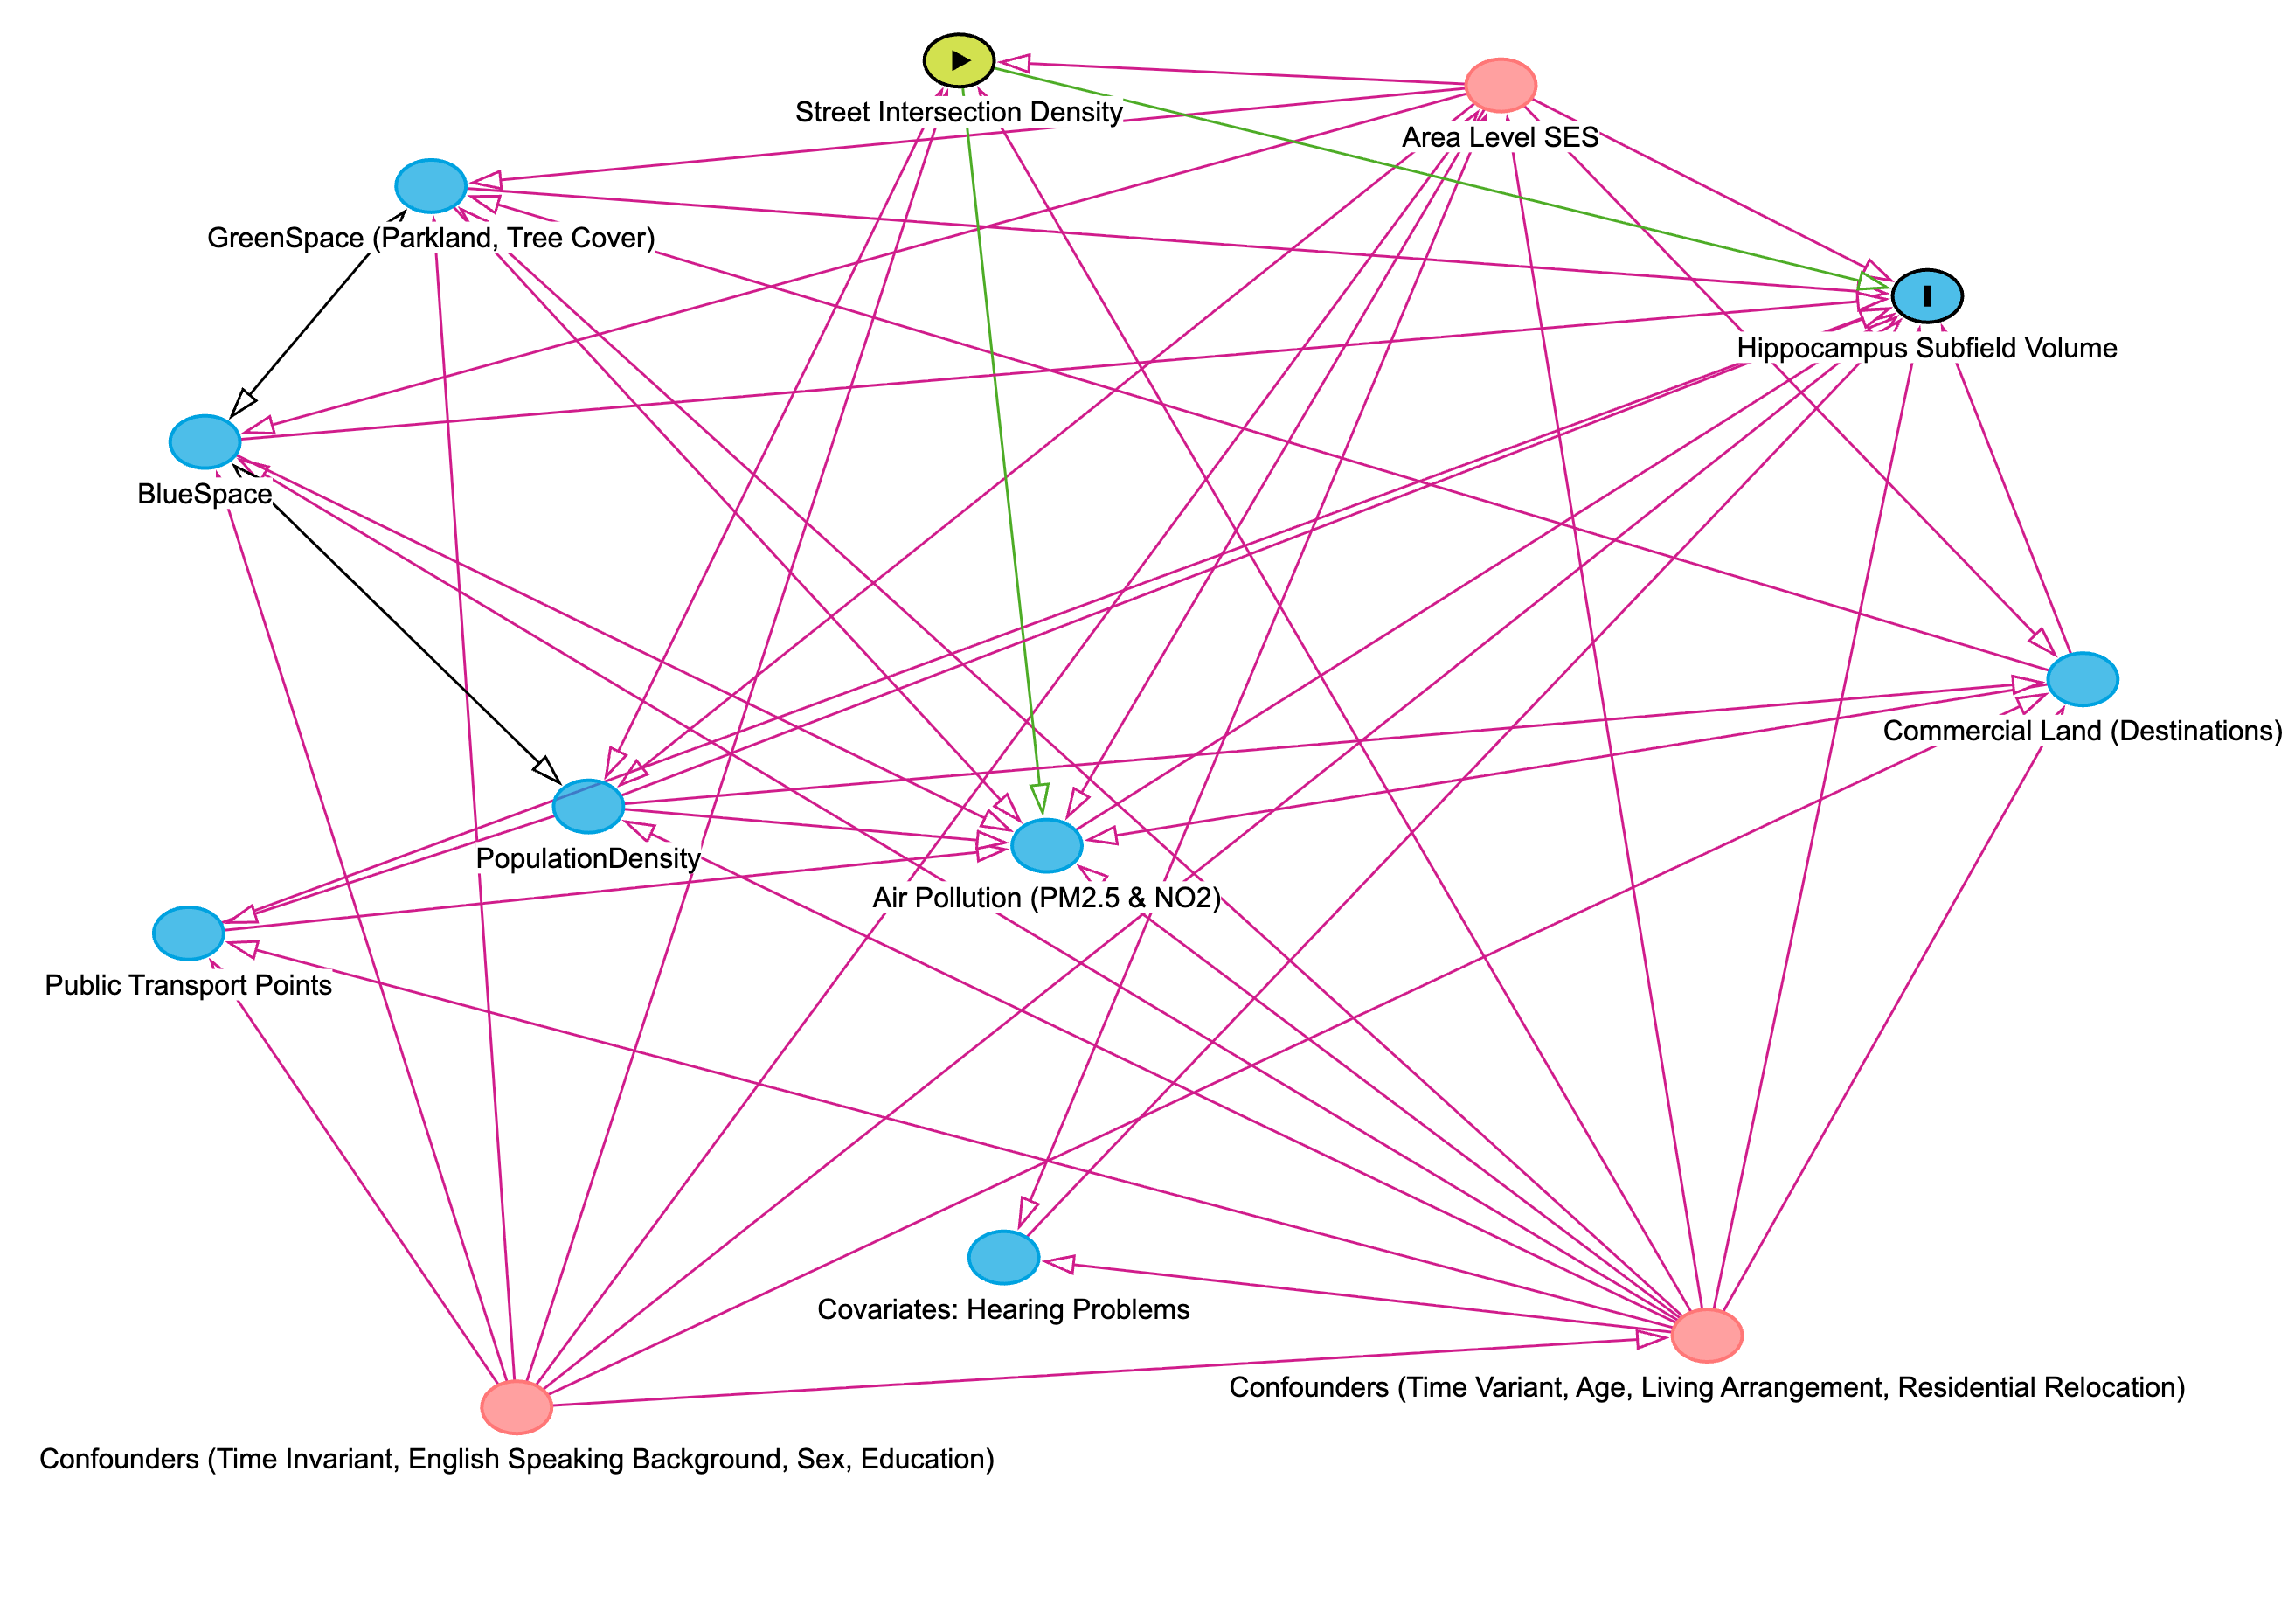


**Figure S5.** Trajectories depict model-predicted, population-level percent volume retention in hippocampal subfields that showed significant age-related change from 70 to 90 years. Predictions are based on a reference individual, with all continuous covariates set to sample means. Random intercepts and age slopes were included in the models but are not reflected in the fixed-effects predictions shown here.

**
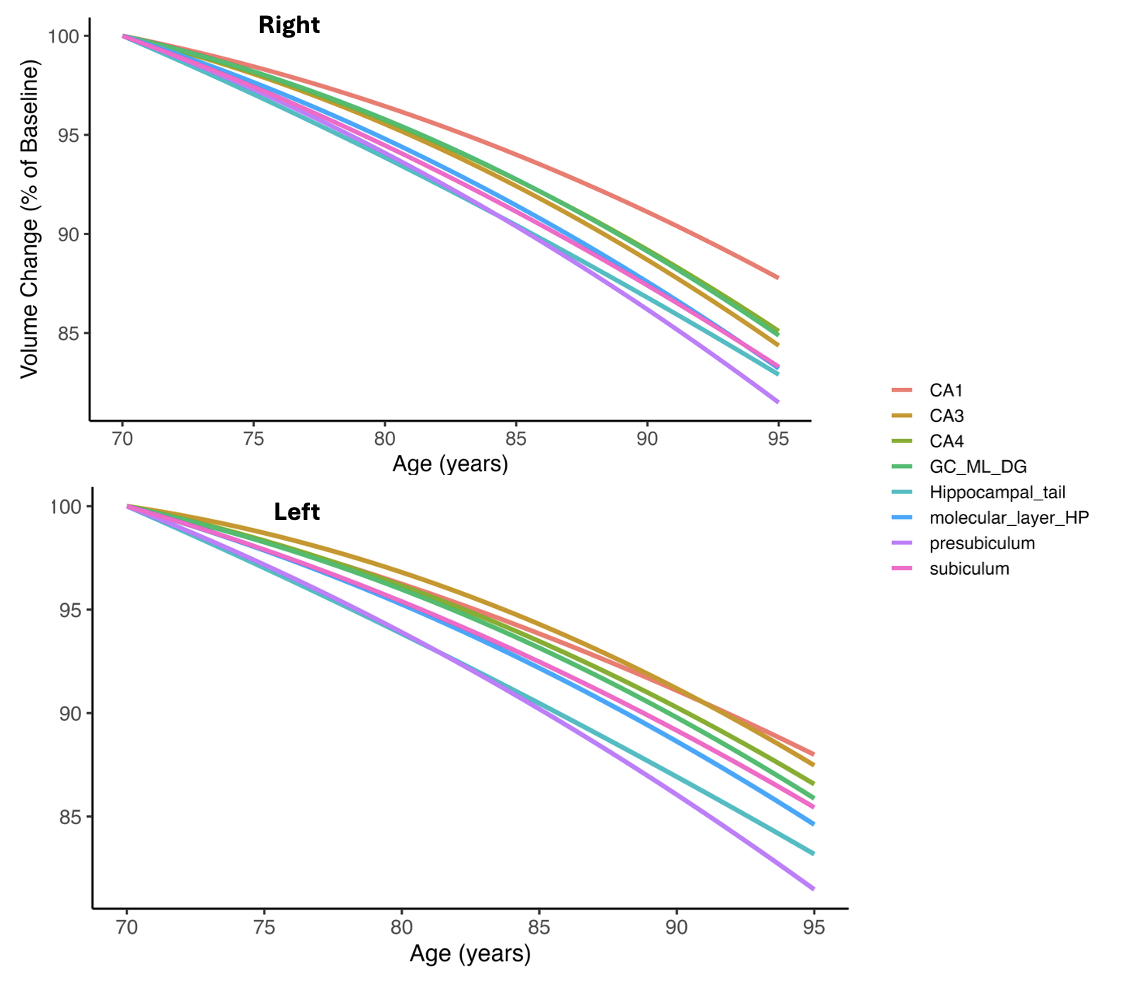
**

**Table S1:** Predictors of participants’ remaining in the study at Waves 2 and Wave 4

| Variable | OR | 95% CI | P-Value |
| --- | --- | --- | --- |
| ***Retention at Wave 2*** |  |  |  |
| Age | 1.04 | (1, 1.08) | 0.041 |
| Baseline Work (No. of Hours) | 0.97 | (0.94, 1) | 0.127 |
| Mobile without mobility aids | 0.48 | (0.31, 0.75) | 0.001 |
| ***Retention at Wave 4*** | 4.74 | (0.6, 37.65) | 0.14 |
| Age | 1.07 | (1.03, 1.12) | 0.001 |
| Baseline Work (No. of Hours) | 0.97 | (0.95, 1) | 0.063 |
| Mobile without mobility aids | 0.56 | (0.34, 0.89) | 0.017 |

**Table S2:** This table presents standardized beta estimates, 95% confidence intervals (CIs), t-statistics, and p-values for within-person change in street intersection density with within-person change in hippocampal subfield volume. Regions are listed separately for the right (R) and left (L.).

|  | Within person change (Main Effect) | | |
| --- | --- | --- | --- |
| Regions | **estimates (95% CI)** | **t-value** | ***p-value*** |
| R.subiculum | 0.00102 (-0.502, 0.504) | 0.004 | 0.997 |
| R.parasubiculum | -0.013 (-0.206, 0.18) | -0.135 | 0.893 |
| R.presubiculum | -0.237 (-0.647, 0.172) | -1.137 | 0.256 |
| R.hippocampal.fissure | -0.21 (-0.651, 0.231) | -0.935 | 0.35 |
| R.CA1 | -0.151 (-0.834, 0.532) | -0.436 | 0.663 |
| R.CA3 | 0.019 (-0.333, 0.372) | 0.108 | 0.914 |
| R.CA4 | -0.014 (-0.377, 0.348) | -0.078 | 0.938 |
| R.HATA | 0.04 (-0.081, 0.161) | 0.655 | 0.513 |
| R.molecular_layer_HP | -0.142 (-0.754, 0.471) | -0.454 | 0.65 |
| R.fimbria | 0.137 (-0.114, 0.388) | 1.071 | 0.285 |
| R.Hippocampal_tail | -0.551 (-1.305, 0.202) | -1.437 | 0.151 |
| R. GC-ML-DG | -0.00934 (-0.402, 0.384) | -0.047 | 0.963 |
| L.subiculum | -0.188 (-0.634, 0.258) | -0.828 | 0.408 |
| L.parasubiculum | -0.00115 (-0.177, 0.175) | -0.013 | 0.99 |
| L.presubiculum | -0.313 (-0.717, 0.092) | -1.518 | 0.129 |
| L.hippocampal.fissure | -0.331 (-0.739, 0.077) | -1.592 | 0.112 |
| L.CA1 | -0.293 (-0.887, 0.3) | -0.97 | 0.332 |
| L.CA3 | -0.099 (-0.395, 0.197) | -0.658 | 0.511 |
| L.CA4 | -0.083 (-0.383, 0.217) | -0.54 | 0.589 |
| L.HATA | -0.045 (-0.149, 0.058) | -0.856 | 0.392 |
| L.molecular_layer_HP | -0.287 (-0.804, 0.229) | -1.093 | 0.275 |
| L.fimbria | 0.11 (-0.125, 0.345) | 0.918 | 0.359 |
| L.Hippocampal_tail | -0.477 (-1.122, 0.168) | -1.453 | 0.147 |
| L. GC-ML-DG | -0.126 (-0.447, 0.195) | -0.772 | 0.441 |

**Table S3:** This table presents standardized beta estimates, 95% confidence intervals (CIs), t-statistics, and p-values for the within-person change in street intersection density with within-person changes in trajectory of hippocampal subfield volume (linear). Regions are listed separately for the right (R) and left (L.).

|  | Age * Within Person Change (Interaction Effect) | | |
| --- | --- | --- | --- |
| Regions | **estimates (95% CI)** | **t-value** | ***p-value*** |
| R.subiculum | 0.0018 (-0.06, 0.064) | 0.057 | 0.955 |
| R.parasubiculum | 0.00629 (-0.018, 0.031) | 0.508 | 0.611 |
| R.presubiculum | 0.031 (-0.02, 0.083) | 1.201 | 0.23 |
| R.hippocampal.fissure | 0.016 (-0.04, 0.072) | 0.57 | 0.569 |
| R.CA1 | 0.035 (-0.05, 0.119) | 0.809 | 0.419 |
| R.CA3 | -0.00084 (-0.045, 0.043) | -0.038 | 0.97 |
| R.CA4 | 0.00083 (-0.045, 0.046) | 0.036 | 0.971 |
| R.HATA | -0.00386 (-0.019, 0.011) | -0.495 | 0.621 |
| R.molecular_layer_HP | 0.024 (-0.052, 0.1) | 0.626 | 0.532 |
| R.fimbria | -0.019 (-0.051, 0.013) | -1.179 | 0.239 |
| R.Hippocampal_tail | 0.076 (-0.018, 0.171) | 1.589 | 0.113 |
| R. GC-ML-DG | 0.00158 (-0.047, 0.051) | 0.063 | 0.95 |
| L.subiculum | 0.028 (-0.028, 0.083) | 0.985 | 0.325 |
| L.parasubiculum | -0.00062 (-0.023, 0.022) | -0.055 | 0.956 |
| L.presubiculum | 0.039 (-0.011, 0.09) | 1.524 | 0.128 |
| L.hippocampal.fissure | 0.038 (-0.013, 0.09) | 1.455 | 0.146 |
| L.CA1 | 0.018 (-0.056, 0.092) | 0.478 | 0.633 |
| L.CA3 | 0.014 (-0.022, 0.051) | 0.775 | 0.439 |
| L.CA4 | 0.00995 (-0.027, 0.047) | 0.524 | 0.6 |
| L.HATA | 0.00681 (-0.0063, 0.02) | 1.02 | 0.308 |
| L.molecular_layer_HP | 0.03 (-0.033, 0.093) | 0.929 | 0.353 |
| L.fimbria | -0.015 (-0.045, 0.015) | -0.987 | 0.324 |
| L.Hippocampal_tail | 0.042 (-0.039, 0.122) | 1.014 | 0.311 |
| L. GC-ML-DG | 0.014 (-0.026, 0.053) | 0.692 | 0.489 |

**Table S4:**

This table presents standardized beta estimates, 95% confidence intervals (CIs), t-statistics, and p-values for the within-person change in street intersection density with within-person changes in trajectory of hippocampal subfield volume (quadratic). Regions are listed separately for the right (R) and left (L.).

|  | Age (Quadratic) * Within Person Change (Interaction Effect) | | |
| --- | --- | --- | --- |
| Regions | estimates (95% CI) | t-value | *p-value* |
| R.subiculum | -0.00016 (-0.00205, 0.00174) | -0.164 | 0.87 |
| R.parasubiculum | -0.00027 (-0.00102, 0.00048) | -0.696 | 0.487 |
| R.presubiculum | -0.00118 (-0.00275, 4e-04) | -1.47 | 0.142 |
| R.hippocampal.fissure | -0.00022 (-0.00195, 0.0015) | -0.255 | 0.799 |
| R.CA1 | -0.0012 (-0.00377, 0.00137) | -0.919 | 0.358 |
| R.CA3 | -4e-05 (-0.00139, 0.0013) | -0.063 | 0.95 |
| R.CA4 | 4e-05 (-0.00136, 0.00144) | 0.062 | 0.95 |
| R.HATA | 7e-05 (-0.00041, 0.00054) | 0.283 | 0.777 |
| R.molecular_layer_HP | -0.00081 (-0.00311, 0.0015) | -0.69 | 0.491 |
| R.fimbria | 0.00057 (-4e-04, 0.00155) | 1.152 | 0.25 |
| R.Hippocampal_tail | -0.00206 (-0.00495, 0.00084) | -1.396 | 0.163 |
| R. GC-ML-DG | 0 (-0.0015, 0.0015) | -0.002 | 0.998 |
| L.subiculum | -0.00065 (-0.00234, 0.00104) | -0.751 | 0.453 |
| L.parasubiculum | -1e-05 (-7e-04, 0.00068) | -0.027 | 0.978 |
| L.presubiculum | -0.00115 (-0.0027, 4e-04) | -1.457 | 0.146 |
| L.hippocampal.fissure | -0.00052 (-0.0021, 0.00107) | -0.638 | 0.524 |
| L.CA1 | 0.00032 (-0.00193, 0.00257) | 0.278 | 0.781 |
| L.CA3 | -0.00023 (-0.00135, 0.00088) | -0.409 | 0.682 |
| L.CA4 | -5e-05 (-0.00119, 0.00109) | -0.088 | 0.93 |
| L.HATA | -2e-04 (-0.00061, 2e-04) | -0.982 | 0.327 |
| L.molecular_layer_HP | -0.00027 (-0.0022, 0.00166) | -0.275 | 0.784 |
| L.fimbria | 0.00023 (-0.00069, 0.00115) | 0.49 | 0.624 |
| L.Hippocampal_tail | -0.00038 (-0.00284, 0.00208) | -0.305 | 0.761 |
| L. GC-ML-DG | -0.00016 (-0.00136, 0.00105) | -0.254 | 0.8 |
